# Supplementary material for: An agent-based model simulation of influenza interactions at the host level: insight into the influenza-related burden of pneumococcal infections
Source: Springer Nature journal article supplement (doi:10.1186/s12879-017-2464-z), 2017-06-02

**Figure 6.1. Number of influenza-attributable PI cases for different carriage rates of pneumococcus in the population.** The average burden over the simulated years was assessed for three different values of pneumococcus' carriage rate (10%, 20%, and 30%), for a selection of scenarios. We note that because the pathogenicity mechanism involves a linear process, even if the number of cases increases with the carriage rate, the proportion of influenza-attributable PI remains constant.

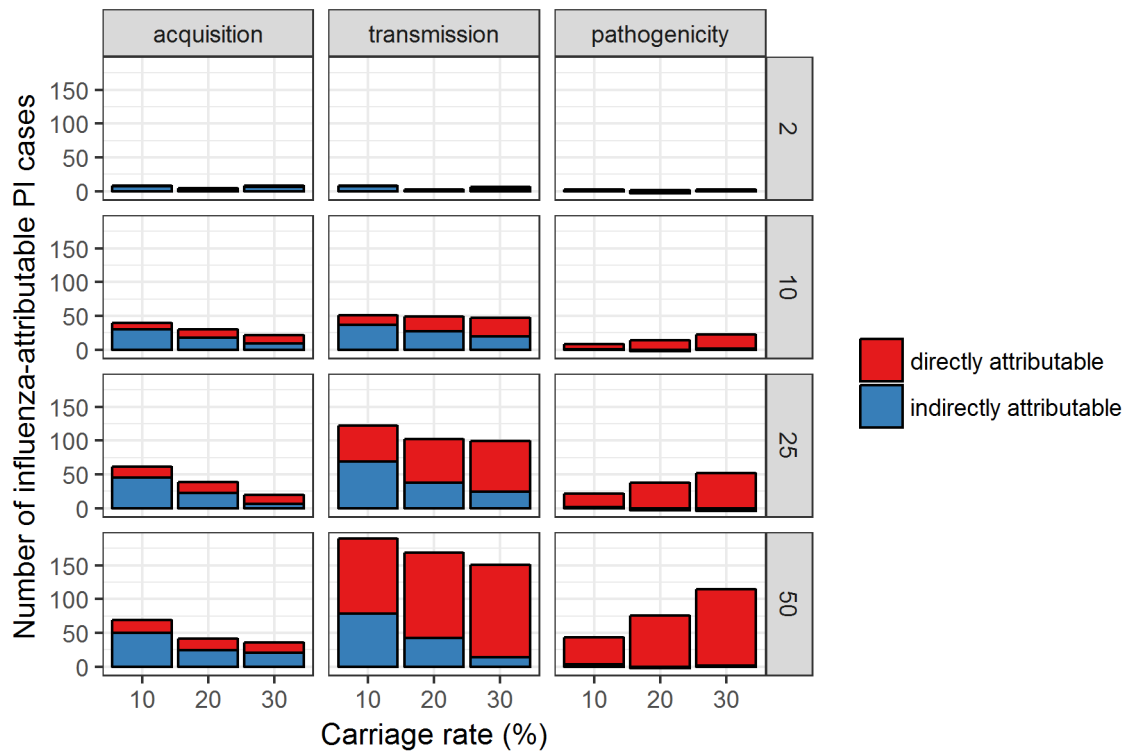

**Figure 6.2. Number of influenza-attributable PI cases for different movement patterns of the individuals in the simulated world.** The average burden over the simulated years was assessed for three different values of “jump sizes” representing the movements of the individuals around the simulated world (2, 10, 50), for a selection of scenarios.

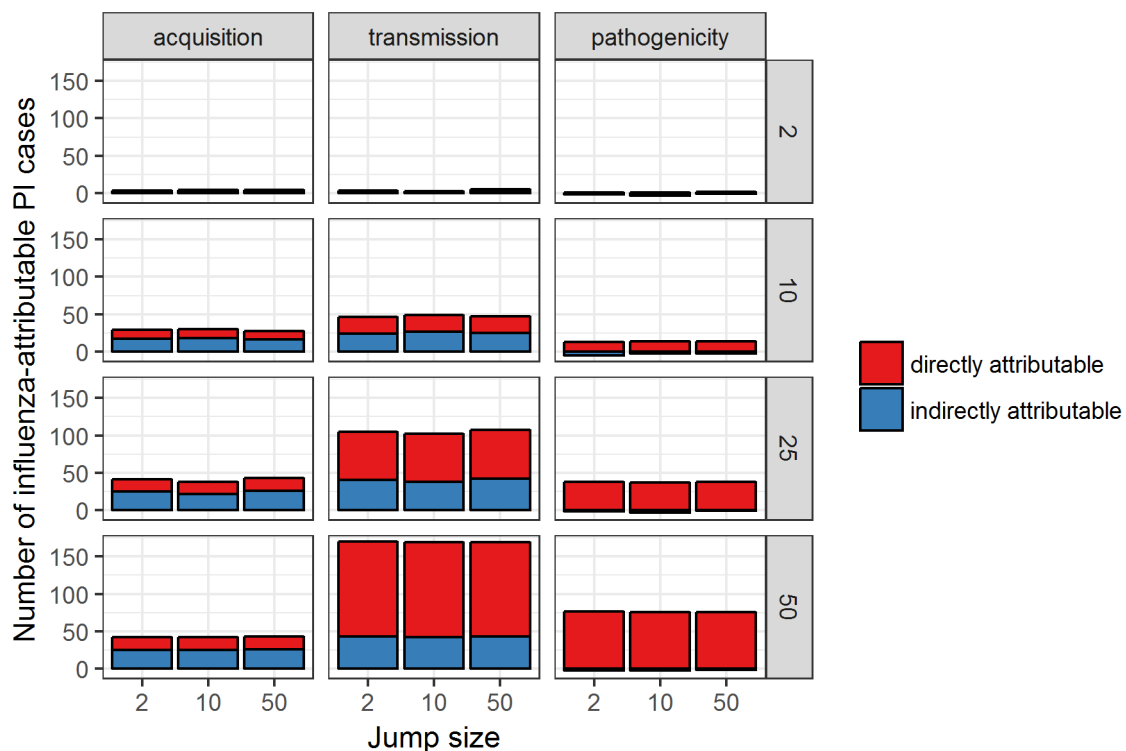

**Figure 6.3. Influenza-induced burden of PI cases depending on the type of influenza epidemic.** Seasonal influenza epidemics corresponding to  $R_0=1.3$ , and pandemic influenza outbreaks corresponding to  $R_0=2$  were simulated. The average burden associated with each type of influenza epidemic is represented for the three interaction mechanisms.

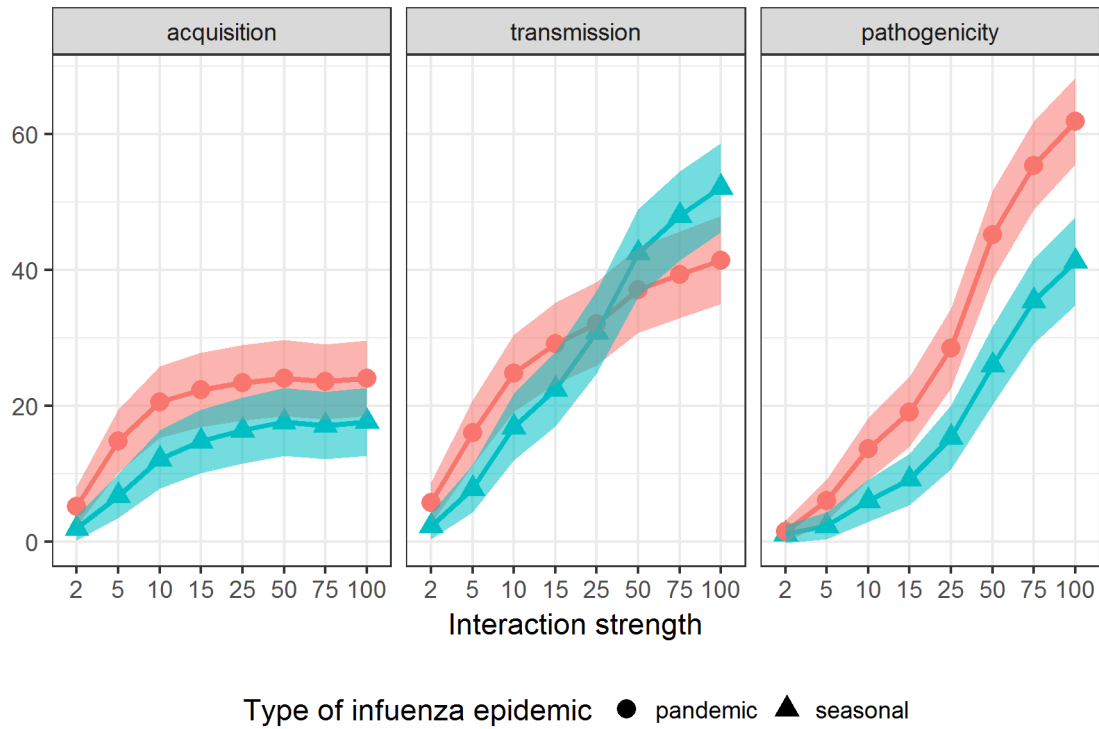

Supplement: MOESM6 [file 12335390]
